# Supplementary material for: First Trimester Circulating MicroRNA Biomarkers Predictive of Subsequent Preterm Delivery and Cervical Shortening
Source: PubMed Central journal article supplement (PMC6458157; doi:10.1038/s41598-019-42166-1), 2019-04-10
Supplement: 41598_2019_42166_MOESM1_ESM.pdf [file 41598_2019_42166_MOESM1_ESM.pdf]

# Supplementary Figures

**Manuscript title:**

First Trimester Circulating  
MicroRNA Biomarkers Predictive  
of Subsequent Preterm Delivery  
and Cervical Shortening

**List of authors:**

J Cook<sup>1,2,4</sup>, PR Bennett<sup>1,2</sup>, SH Kim<sup>1</sup>, TG Teoh<sup>1,4</sup>, L Sykes<sup>1,2</sup>, LM  
Kindinger<sup>1,2,4</sup>, A Garrett<sup>1</sup>, R Binkhamis<sup>1</sup>, DA MacIntyre<sup>1</sup> and V  
Terzidou<sup>1, 3, \*</sup>

| MicroRNAs expressed in plasma of healthy pregnant women |                 |                 |                |
|---------------------------------------------------------|-----------------|-----------------|----------------|
| hsa-let-7a-5p                                           | hsa-miR-149-5p  | hsa-miR-23a-3p  | hsa-miR-548aa  |
| hsa-let-7b-5p                                           | hsa-miR-150-5p  | hsa-miR-25-3p   | hsa-miR-548ai  |
| hsa-let-7g-5p                                           | hsa-miR-15a-5p  | hsa-miR-2682-5p | hsa-miR-548al  |
| hsa-miR-106b-5p                                         | hsa-miR-15b-5p  | hsa-miR-26b-5p  | hsa-miR-570-3p |
| hsa-miR-107                                             | hsa-miR-16-5p   | hsa-miR-297     | hsa-miR-574-5p |
| hsa-miR-1183                                            | hsa-miR-185-5p  | hsa-miR-302b-3p | hsa-miR-576-5p |
| hsa-miR-122-5p                                          | hsa-miR-188-5p  | hsa-miR-302d-3p | hsa-miR-579    |
| hsa-miR-1238                                            | hsa-miR-191-5p  | hsa-miR-371a-3p | hsa-miR-590-5p |
| hsa-miR-125b-5p                                         | hsa-miR-199a-5p | hsa-miR-378e    | hsa-miR-598    |
| hsa-miR-126-3p                                          | hsa-miR-19b-3p  | hsa-miR-4443    | hsa-miR-612    |
| hsa-miR-141-3p                                          | hsa-miR-219-5p  | hsa-miR-4454    | hsa-miR-631    |
| hsa-miR-142-3p                                          | hsa-miR-22-3p   | hsa-miR-451a    | hsa-miR-761    |
| hsa-miR-144-3p                                          | hsa-miR-222-3p  | hsa-miR-495     | hsa-miR-769-5p |
| hsa-miR-148b-3p                                         | hsa-miR-223-3p  | hsa-miR-514b-5p | hsa-miR-93-5p  |

**Supplementary Table S1. MiRNAs expressed in human plasma in healthy pregnancy from 12-22 weeks gestation.** The miRNAs listed were identified by nCounter miRNA expression profiling assay in more than 50% of samples at any time point.

| miRNA           | Outcome            | TIME POINT A             |     |         | TIME POINT C             |      |         |
|-----------------|--------------------|--------------------------|-----|---------|--------------------------|------|---------|
|                 |                    | Mean relative expression | SEM | P value | Mean relative expression | SEM  | P value |
| hsa-miR-150-5p  | Outcome 1- TERM    | 1.0                      | 0.8 |         | 1.0                      | 0.1  |         |
|                 | Outcome 2- PRETERM | 8.0                      | 7.0 | <0.001  | 4.6                      | 5.7  | 0.005   |
|                 | Outcome 3- SHORT   | 3.0                      | 0.9 | 0.001   | 4.9                      | 2.6  | 0.005   |
| hsa-miR-374a-5p | Outcome 1- TERM    | 1.0                      | 0.4 |         | 1.0                      | 0.4  |         |
|                 | Outcome 2- PRETERM | 3.4                      | 3.7 | 0.005   | 3.4                      | 3.5  | 0.05    |
|                 | Outcome 3- SHORT   | 2.5                      | 2.4 | 0.04    | 2.5                      | 2.2  | 0.001   |
| hsa-miR-19b-3p  | Outcome 1- TERM    | 1.0                      | 0.4 |         | 1.0                      | 0.3  |         |
|                 | Outcome 2- PRETERM | 5.1                      | 4.0 | 0.002   | 4.8                      | 4.0  | 0.03    |
|                 | Outcome 3- SHORT   | 2.5                      | 1.3 | 0.01    | 4.9                      | 1.9  | <0.001  |
| hsa-miR-185-5p  | Outcome 1- TERM    | 1.0                      | 0.8 |         | 1.0                      | 0.3  |         |
|                 | Outcome 2- PRETERM | 2.0                      | 1.5 | 0.003   | 5.5                      | 5.0  | 0.03    |
|                 | Outcome 3- SHORT   | 1.5                      | 1.1 | 0.01    | 5.5                      | 2.1  | <0.001  |
| hsa-miR-15b-5p  | Outcome 1- TERM    | 1.0                      | 0.7 |         | 1.0                      | 0.4  |         |
|                 | Outcome 2- PRETERM | 7.8                      | 8.4 | <0.0001 | 3.9                      | 5.0  | 0.05    |
|                 | Outcome 3- SHORT   | 2.2                      | 0.9 | 0.00    | 4.7                      | 2.4  | <0.001  |
| hsa-miR-191-5p  | Outcome 1- TERM    | 1.0                      | 0.2 |         | 1.0                      | 1.2  |         |
|                 | Outcome 2- PRETERM | 3.3                      | 1.0 | 0.015   | 3.9                      | 21.0 | ns      |
|                 | Outcome 3- SHORT   | 2.2                      | 0.7 | 0.04    | 5.0                      | 9.0  | <0.0001 |
| hsa-miR-93-5p   | Outcome 1- TERM    | 1.0                      | 0.3 |         | 1.0                      | 0.2  |         |
|                 | Outcome 2- PRETERM | 2.4                      | 1.4 | 0.03    | 4.9                      | 3.5  | 0.05    |
|                 | Outcome 3- SHORT   | 1.6                      | 0.7 | ns      | 5.5                      | 1.9  | <0.0001 |
| hsa-let-7a-5p   | Outcome 1- TERM    | 1.0                      | 0.4 |         | 1.0                      | 0.1  |         |
|                 | Outcome 2- PRETERM | 1.3                      | 0.6 | ns      | 2.2                      | 1.2  | ns      |
|                 | Outcome 3- SHORT   | 2.4                      | 2.5 | ns      | 3.0                      | 0.9  | 0.01    |
| hsa-miR-23a-3p  | Outcome 1- TERM    | 1.0                      | 0.9 |         | 1.0                      | 0.6  |         |
|                 | Outcome 2- PRETERM | 3.5                      | 4.9 | ns      | 4.2                      | 6.0  | 0.04    |
|                 | Outcome 3- SHORT   | 2.6                      | 2.2 | 0.01    | 6.4                      | 3.8  | <0.0001 |

**Supplementary Table S2. Cell-free plasma microRNAs with differential expression in the validation cohort.** Expression of specific miRNAs was measured using RT-PCR in women who had normal cervical length and delivered at term (Outcome 1) and was compared to women who delivered preterm (Outcome 2) or women who developed early cervical shortening (Outcome 3). Expression was compared at each gestational time-point. Differential expression was defined as a false discovery rate <0.05 in samples taken at time point A (12-14<sup>+6</sup> weeks) and/or time point C (18-21<sup>+6</sup> weeks).

| miRNA           | Outcome            | TIME POINT C             |         |                                          |                   |
|-----------------|--------------------|--------------------------|---------|------------------------------------------|-------------------|
|                 |                    | Area under the ROC curve | P value | Specificity %<br>for 100% Detection Rate | 95% CI            |
|                 | Outcome 1- TERM    |                          |         |                                          |                   |
| hsa-miR-150-5p  | Outcome 2- PRETERM | 0.87                     | <0.0001 | 62.67                                    | 50.73% to 73.57%  |
|                 | Outcome 3- SHORT   | 0.84                     | <0.0001 | 14.67                                    | 7.556% to 24.73%  |
|                 | Outcome 1- TERM    |                          |         |                                          |                   |
| hsa-miR-374a-5p | Outcome 2- PRETERM | 0.81                     | 0.0006  | 28                                       | 18.24% to 39.56%  |
|                 | Outcome 3- SHORT   | 0.83                     | <0.0001 | 6.667                                    | 2.2% to 14.88%    |
|                 | Outcome 1- TERM    |                          |         |                                          |                   |
| hsa-miR-19b-3p  | Outcome 2- PRETERM | 0.79                     | 0.0013  | 44                                       | 32.55% to 55.94%  |
|                 | Outcome 3- SHORT   | 0.79                     | <0.0001 | 10.67                                    | 4.719% to 19.94%  |
|                 | Outcome 1- TERM    |                          |         |                                          |                   |
| hsa-miR-185-5p  | Outcome 2- PRETERM | 0.76                     | 0.0034  | 22.67                                    | 13.79% to 33.79%  |
|                 | Outcome 3- SHORT   | 0.80                     | <0.0001 | 22.67                                    | 13.79% to 33.79%  |
|                 | Outcome 1- TERM    |                          |         |                                          |                   |
| hsa-miR-15b-5p  | Outcome 2- PRETERM | 0.76                     | 0.0035  | 17.33                                    | 9.565% to 27.81%  |
|                 | Outcome 3- SHORT   | 0.77                     | <0.0001 | 2.667                                    | 0.3246% to 9.303% |
|                 | Outcome 1- TERM    |                          |         |                                          |                   |
| hsa-miR-191-5p  | Outcome 2- PRETERM | 0.69                     | 0.0375  | 12                                       | 5.637% to 21.56%  |
|                 | Outcome 3- SHORT   | 0.66                     | 0.0085  | 2.667                                    | 0.3246% to 9.303% |
|                 | Outcome 1- TERM    |                          |         |                                          |                   |
| hsa-miR-93-5p   | Outcome 2- PRETERM | 0.75                     | 0.0061  | 32                                       | 21.69% to 43.78%  |
|                 | Outcome 3- SHORT   | 0.79                     | <0.0001 | 12                                       | 5.637% to 21.56%  |
|                 | Outcome 1- TERM    |                          |         |                                          |                   |
| hsa-let-7a-5p   | Outcome 2- PRETERM | 0.69                     | 0.0332  | 25.33                                    | 15.99% to 36.7%   |
|                 | Outcome 3- SHORT   | 0.73                     | 0.0002  | 4                                        | 0.8326% to 11.25% |
|                 | Outcome 1- TERM    |                          |         |                                          |                   |
| hsa-miR-23a-3p  | Outcome 2- PRETERM | 0.81                     | 0.0006  | 37.33                                    | 26.43% to 49.27%  |
|                 | Outcome 3- SHORT   | 0.81                     | <0.0001 | 17.33                                    | 9.565% to 27.81%  |

**Supplementary Table S3. Prediction of preterm delivery and cervical shortening by cell-free individual plasma microRNA expression.** ROC curves were calculated to determine the sensitivity and specificity of individual plasma miRNAs to predict preterm delivery or cervical shortening at time point C (18-21<sup>+6</sup> weeks) (Outcome 1/Term-women with no cervical shortening ,n=75, Outcome 2/ Preterm- women with spontaneous PTL<34 weeks, n=12 and Outcome 3/Short- Women with early cervical shortening prior 22 weeks, n=30 ).

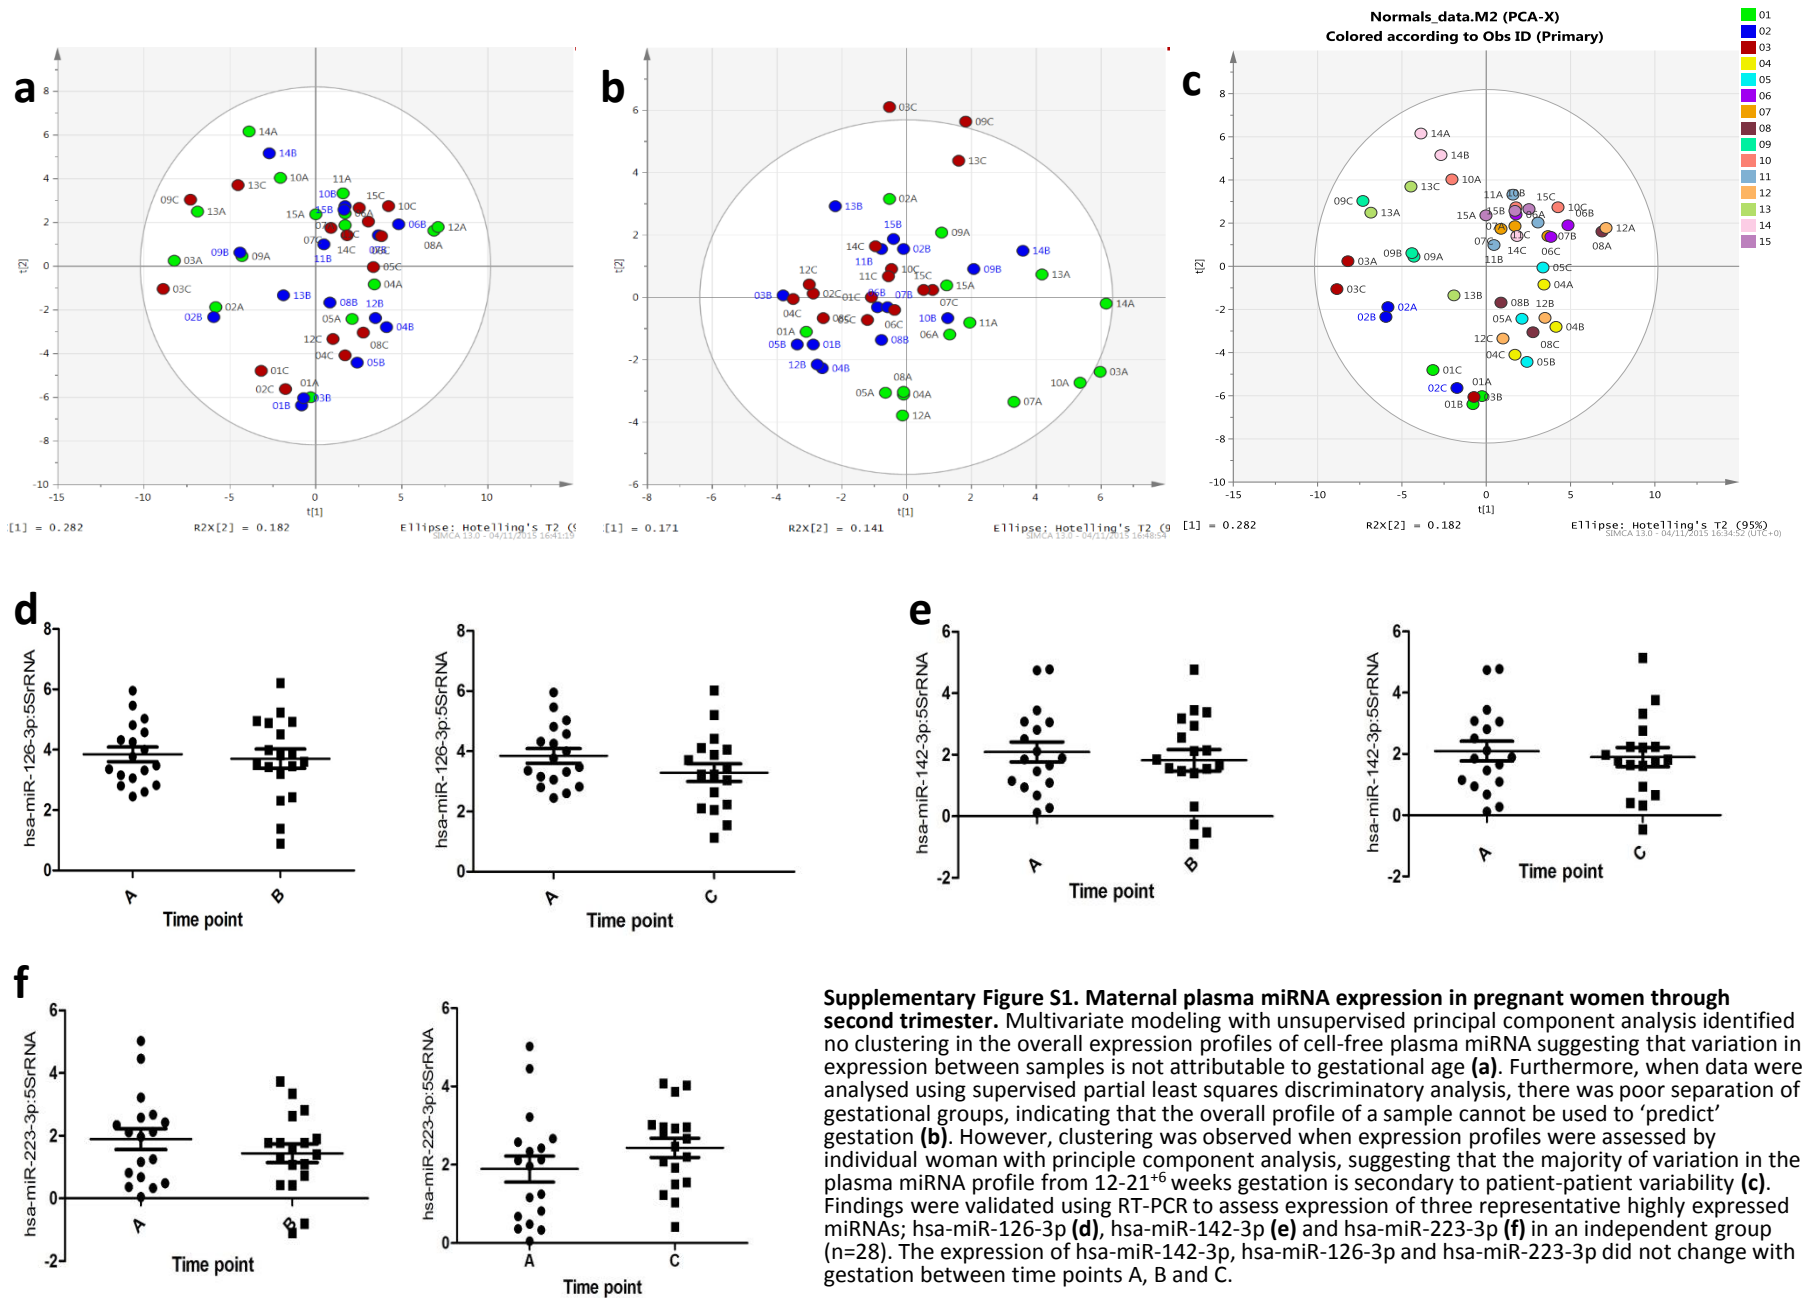

**Supplementary Figure S1. Maternal plasma miRNA expression in pregnant women through second trimester.** Multivariate modeling with unsupervised principal component analysis identified no clustering in the overall expression profiles of cell-free plasma miRNA suggesting that variation in expression between samples is not attributable to gestational age (**a**). Furthermore, when data were analysed using supervised partial least squares discriminatory analysis, there was poor separation of gestational groups, indicating that the overall profile of a sample cannot be used to 'predict' gestation (**b**). However, clustering was observed when expression profiles were assessed by individual woman with principle component analysis, suggesting that the majority of variation in the plasma miRNA profile from 12-21<sup>+6</sup> weeks gestation is secondary to patient-patient variability (**c**). Findings were validated using RT-PCR to assess expression of three representative highly expressed miRNAs; hsa-miR-126-3p (**d**), hsa-miR-142-3p (**e**) and hsa-miR-223-3p (**f**) in an independent group (n=28). The expression of hsa-miR-142-3p, hsa-miR-126-3p and hsa-miR-223-3p did not change with gestation between time points A, B and C.

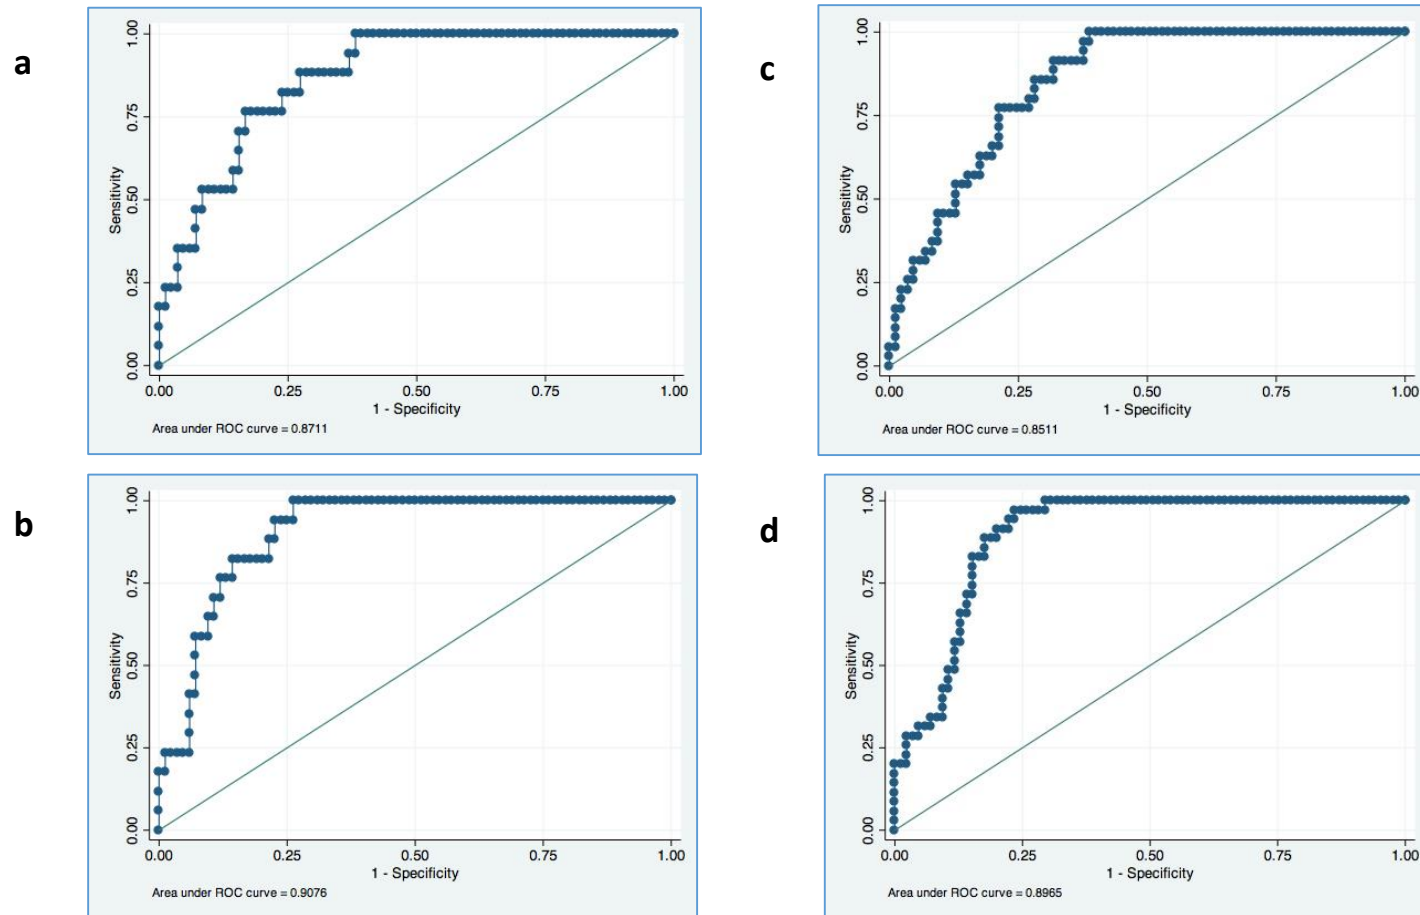

**Supplementary Figure S2. Prediction of preterm delivery and cervical shortening by combining individual cell-free plasma microRNA expression at 12-14<sup>+6</sup> gestation.** ROC curves were calculated to determine the sensitivity and specificity by combining **(a)** the top 3 individual miRNAs (AUC=0.8711) **(b)** the top 7 miRNAs to predict preterm delivery (AUC=0.911). **(c)** The top 4 miRNAs to predict cervical shortening gave an AUC of 0.8511 and **(d)** all nine miRNAs AUC=0.8965.

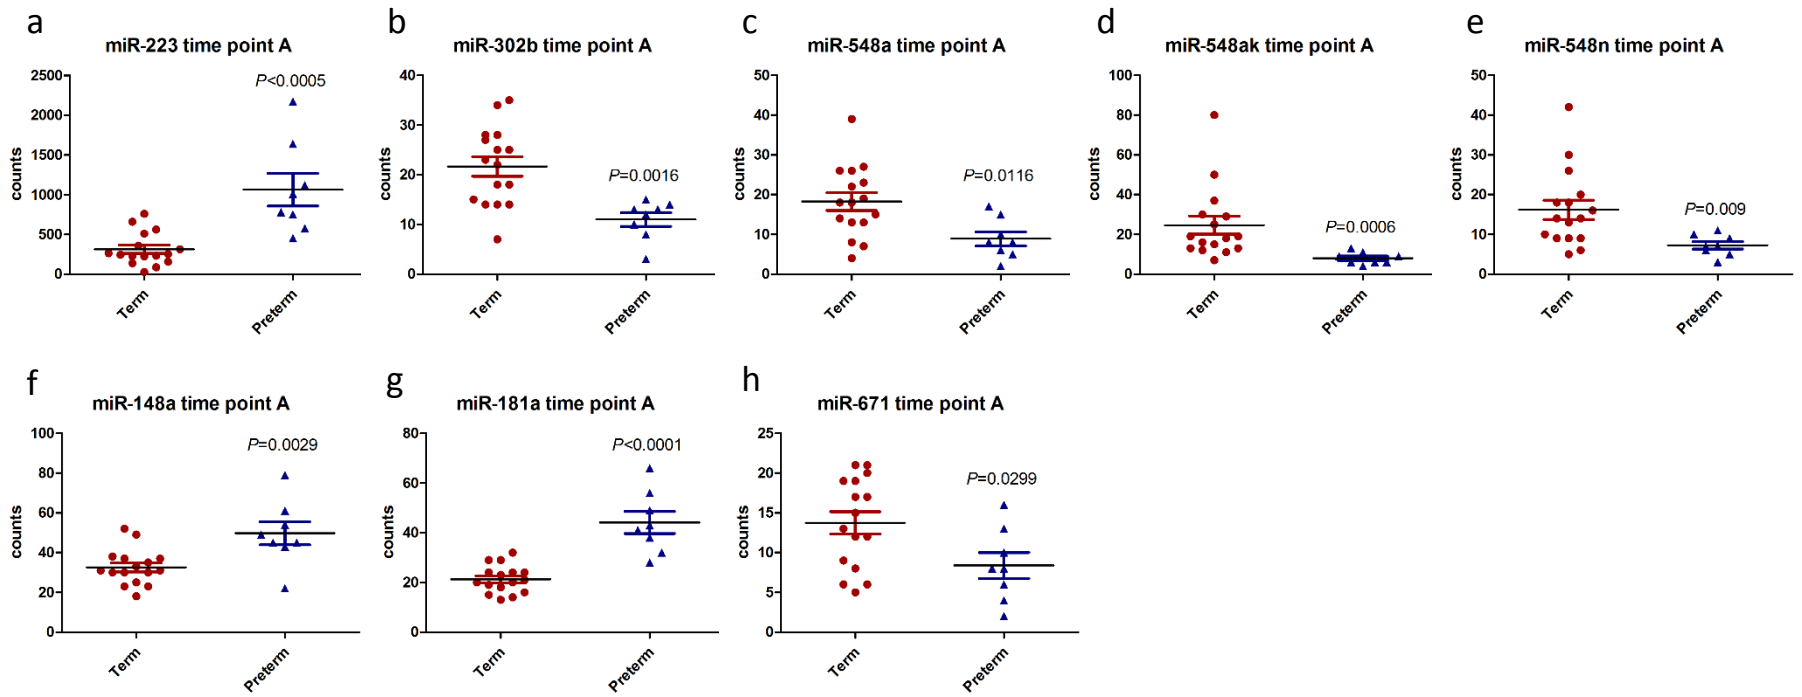

**Supplementary Figure S3. Expression of previously reported plasma miRNAs that are differentially expressed in preterm samples at 12-14<sup>+6</sup> weeks gestation.** nCounter miRNA expression profiling assay digital counts of plasma miRNAs, miR at time point A (12-14+6 weeks) from women who went on to deliver at term or preterm. Individual data are presented with SEM. *P* values were obtained by Mann-Whitney U test.
